# Supplementary material for: European Phaseolus coccineus L. landraces: Population Structure and Adaptation, as Revealed by cpSSRs and Phenotypic Analyses
Source: PLoS One. 2013 Feb 22;8(2):e57337. doi: 10.1371/journal.pone.0057337 (PMC3579852; doi:10.1371/journal.pone.0057337)
Supplement: Table S1 — List and details of the 380 P. coccineus accessions. (XLS) [file pone.0057337.s002.xls]

## Sheet: Table S1
Table S1. List and details of the 380 P. coccineus accessions.
No	code	Shared with Spataro et al. 2011	Donor	Accession number	Species	Varieties	Status	Continent	Country	Collection site	Province	Region	Lat (°N)	Lon (°)	Alt (m)
1	PHA8374-E-ALB		IPK	PHAS 8374	P. coccineus	albiflorus	Landrace	Europe	Albania	Vrisera			39.88	20.35	200
2	PHA8401-E-ALB		IPK	PHAS 8401	P. coccineus	albiflorus	Landrace	Europe	Albania	Voskopoja w Korça,			40.6	20.68
3	PHA8218-E-AUS		IPK	PHAS 8218	P. coccineus	bicolor	Landrace	Europe	Austria	Gleinstätten		Steiermark	46.75	15.37
4	PHA8219-E-AUS		IPK	PHAS 8219	P. coccineus	bicolor	Landrace	Europe	Austria	Gleinstätten		Steiermark	46.75	15.37
5	PHA8220-E-AUS		IPK	PHAS 8220	P. coccineus	coccineus	Landrace	Europe	Austria	Gleinstätten		Steiermark	46.75	15.37
6	PHA8221-E-AUS		IPK	PHAS 8221	P. coccineus	coccineus	Landrace	Europe	Austria	Gleinstätten		Steiermark	46.75	15.37
7	PHA8246-E-AUS		IPK	PHAS 8246	P. coccineus	coccineus	Landrace	Europe	Austria	Landorf (Mettersdorf)		Burgenland	46.82	15.7
8	PHA8247-E-AUS		IPK	PHAS 8247	P. coccineus	coccineus	Landrace	Europe	Austria	St. Peter		Burgenland
9	PHA8248-E-AUS		IPK	PHAS 8248	P. coccineus	bicolor	Landrace	Europe	Austria	St. Peter		Burgenland
10	PHA8249-E-AUS		IPK	PHAS 8249	P. coccineus	coccineus	Landrace	Europe	Austria	Wittmannsdorf (St. Peter)		Burgenland	46.77	15.77
11	PHA8250-E-AUS		IPK	PHAS 8250	P. coccineus	bicolor	Landrace	Europe	Austria	Wittmannsdorf (St. Peter)		Burgenland	46.77	15.77
12	PHA8251-E-AUS		IPK	PHAS 8251	P. coccineus	bicolor	Landrace	Europe	Austria	Wittmannsdorf (St. Peter)		Burgenland	46.77	15.77
13	PHA8252-E-AUS		IPK	PHAS 8252	P. coccineus	bicolor	Landrace	Europe	Austria	Wittmannsdorf (St. Peter)		Burgenland	46.77	15.77
14	PHA8254-E-AUS		IPK	PHAS 8254	P. coccineus	coccineus	Landrace	Europe	Austria	Wittmannsdorf (St. Peter)		Burgenland	46.77	15.77
15	PHA8255-E-AUS		IPK	PHAS 8255	P. coccineus	coccineus	Landrace	Europe	Austria	Waltra (St. Anna)		Burgenland	46.85	15.97
16	PHA8257-E-AUS	Y	IPK	PHAS 8257	P. coccineus	coccineus	Landrace	Europe	Austria	Krast (Oberhaag)		Steiermark	46.67	15.37	432
17	PHA8258-E-AUS		IPK	PHAS 8258	P. coccineus	albiflorus	Landrace	Europe	Austria	Althodis			47.32	16.38
18	PHA8259-E-AUS	Y	IPK	PHAS 8259	P. coccineus	albiflorus	Landrace	Europe	Austria	Heiligenbrunn		Burgenland	47.02	16.42	205
19	PHA8260-E-AUS		IPK	PHAS 8260	P. coccineus	coccineus	Landrace	Europe	Austria	Heiligenbrunn		Burgenland
20	PHA8261-E-AUS		IPK	PHAS 8261	P. coccineus	coccineus	Landrace	Europe	Austria	Gschmaier			47.08	15.93
21	PHA8262-E-AUS		IPK	PHAS 8262	P. coccineus	coccineus	Landrace	Europe	Austria	Gschmaier			47.08	15.93
22	PHA8263-E-AUS		IPK	PHAS 8263	P. coccineus	coccineus	Landrace	Europe	Austria	Löffelbach			47.27	15.93
23	PHA8264-E-AUS		IPK	PHAS 8264	P. coccineus	bicolor	Landrace	Europe	Austria	Unterwart		Burgenland
24	PHA8265-E-AUS		IPK	PHAS 8265	P. coccineus	bicolor	Landrace	Europe	Austria	Unterwart		Burgenland
25	PHA8266-E-AUS	Y	IPK	PHAS 8266	P. coccineus	coccineus	Landrace	Europe	Austria	Siget in der Wart		Burgenland	47.32	13.32	1740
26	PHA8267-E-AUS		IPK	PHAS 8267	P. coccineus	bicolor	Landrace	Europe	Austria	Siget in der Wart		Burgenland	47.27	16.28
27	PHA8269-E-AUS		IPK	PHAS 8269	P. coccineus	bicolor	Landrace	Europe	Austria	Vogau		Burgenland	46.72	15.6
28	PHA8272-E-AUS		IPK	PHAS 8272	P. coccineus	albiflorus	Landrace	Europe	Austria	Allersdorf		Steiermark
29	PHA8273-E-AUS	Y	IPK	PHAS 8273	P. coccineus	albiflorus	Landrace	Europe	Austria	Podgoria		Karnten	46.53	14.72	669
30	PHA8274-E-AUS		IPK	PHAS 8274	P. coccineus	coccineus	Landrace	Europe	Austria	Althodis			47.32	16.38
31	PHA8275-E-AUS		IPK	PHAS 8275	P. coccineus	albiflorus	Landrace	Europe	Austria	Kohfidisch			47.17	16.35
32	PHA8276-E-AUS		IPK	PHAS 8276	P. coccineus	albiflorus	Landrace	Europe	Austria	Gschmaier			47.08	15.93
33	PHA8280-E-AUS		IPK	PHAS 8280	P. coccineus	bicolor	Landrace	Europe	Austria	Breitenfeld		Burgenland	47.2	15.52
34	PHA8281-E-AUS		IPK	PHAS 8281	P. coccineus	coccineus	Landrace	Europe	Austria	Weixelbaum (Unterpurkla)		Burgenland	46.74	15.87
35	PHA8282-E-AUS		IPK	PHAS 8282	P. coccineus	albiflorus	Landrace	Europe	Austria	Maltschach		Burgenland	46.67	15.42
36	PHA8288-E-AUS	Y	IPK	PHAS 8288	P. coccineus	albiflorus	Landrace	Europe	Austria	Frankenau		Burgerland	47.45	16.6	165
37	PHA8289-E-AUS		IPK	PHAS 8289	P. coccineus	albiflorus	Landrace	Europe	Austria	Unterwart		Burgenland
38	PHA8290-E-AUS	Y	IPK	PHAS 8290	P. coccineus	albiflorus	Landrace	Europe	Austria	Misselsdorf		Steiermark	46.7	15.78	225
39	PHA8297-E-AUS		IPK	PHAS 8297	P. coccineus	coccineus	Landrace	Europe	Austria	Krast (Oberhaag)		Burgenland	46.67	15.37
40	PHA8300-E-AUS		IPK	PHAS 8300	P. coccineus	bicolor	Landrace	Europe	Austria	Breitenfeld		Burgenland	47.2	15.52
41	PHA8301-E-AUS		IPK	PHAS 8301	P. coccineus	bicolor	Landrace	Europe	Austria	Breitenfeld		Burgenland	47.2	15.52
42	PHA8302-E-AUS		IPK	PHAS 8302	P. coccineus	bicolor	Landrace	Europe	Austria	Breitenfeld		Burgenland	47.2	15.52
43	PHA8303-E-AUS		IPK	PHAS 8303	P. coccineus	coccineus	Landrace	Europe	Austria	Breitenfeld		Burgenland	47.2	15.52
44	PHA8304-E-AUS		IPK	PHAS 8304	P. coccineus	bicolor	Landrace	Europe	Austria	Wolfsberg		Burgenland
45	PHA8305-E-AUS		IPK	PHAS 8305	P. coccineus	coccineus	Landrace	Europe	Austria	St. Peter		Burgenland
46	PHA8306-E-AUS		IPK	PHAS 8306	P. coccineus	bicolor	Landrace	Europe	Austria	St. Peter		Burgenland
47	PHA8307-E-AUS		IPK	PHAS 8307	P. coccineus	albiflorus	Landrace	Europe	Austria	Wittmannsdorf (St. Peter)		Burgenland	46.77	15.77
48	PHA8308-E-AUS		IPK	PHAS 8308	P. coccineus	coccineus	Landrace	Europe	Austria	Vogau		Burgenland	46.72	15.6
49	PHA8309-E-AUS		IPK	PHAS 8309	P. coccineus	bicolor	Landrace	Europe	Austria	Vogau		Burgenland	46.72	15.6
50	PHA8310-E-AUS		IPK	PHAS 8310	P. coccineus	bicolor	Landrace	Europe	Austria	Eichberg		Burgenland
51	PHA8311-E-AUS		IPK	PHAS 8311	P. coccineus	coccineus	Landrace	Europe	Austria	Klausen (Bad Gleichenberg)		Burgenland	46.9	15.88
52	PHA8319-E-AUS		IPK	PHAS 8319	P. coccineus	bicolor	Landrace	Europe	Austria	St. Martin/Wart		Burgenland	47.3	16.23
53	PHA8322-E-AUS		IPK	PHAS 8322	P. coccineus	coccineus	Landrace	Europe	Austria	Allersdorf		Steiermark
54	PHA8323-E-AUS	Y	IPK	PHAS 8323	P. coccineus	coccineus	Landrace	Europe	Austria	Allersdorf		Steiermark	47.13	14.77	757
55	PHA8324-E-AUS		IPK	PHAS 8324	P. coccineus	coccineus	Landrace	Europe	Austria	Klausen (Bad Gleichenberg)		Burgenland	46.9	15.88
56	PHA8325-E-AUS		IPK	PHAS 8325	P. coccineus	coccineus	Landrace	Europe	Austria	Klausen (Bad Gleichenberg)		Burgenland	46.9	15.88
57	PHA8327-E-AUS		IPK	PHAS 8327	P. coccineus	albiflorus	Landrace	Europe	Austria	Stadtschlaining			47.32	16.28
58	PHA8328-E-AUS		IPK	PHAS 8328	P. coccineus	bicolor	Landrace	Europe	Austria	Stadtschlaining			47.32	16.28
59	PHA8329-E-AUS		IPK	PHAS 8329	P. coccineus	coccineus	Landrace	Europe	Austria	Heiligenbrunn		Burgenland
60	PHA8330-E-AUS		IPK	PHAS 8330	P. coccineus	bicolor	Landrace	Europe	Austria	Löffelbach			47.27	15.93
61	PHA8331-E-AUS		IPK	PHAS 8331	P. coccineus	bicolor	Landrace	Europe	Austria	Löffelbach			47.27	15.93
62	PHA8332-E-AUS		IPK	PHAS 8332	P. coccineus	albiflorus	Landrace	Europe	Austria	Löffelbach			47.27	15.93
63	PHA8333-E-AUS		IPK	PHAS 8333	P. coccineus	albiflorus	Landrace	Europe	Austria	Siget in der Wart		Burgenland	47.27	16.28
64	PHA8335-E-AUS	Y	IPK	PHAS 8335	P. coccineus	bicolor	Landrace	Europe	Austria	Landorf (Mettersdorf)		Steiermark	46.78	15.68	262
65	PHA8336-E-AUS		IPK	PHAS 8336	P. coccineus	coccineus	Landrace	Europe	Austria	Wittmannsdorf (St. Peter)		Burgenland	46.77	15.77
66	PHA8337-E-AUS		IPK	PHAS 8337	P. coccineus	bicolor	Landrace	Europe	Austria	Vogau		Burgenland	46.72	15.6
67	PHA8338-E-AUS		IPK	PHAS 8338	P. coccineus	coccineus	Landrace	Europe	Austria	Vogau		Burgenland	46.72	15.6
68	PHA8339-E-AUS		IPK	PHAS 8339	P. coccineus	albiflorus	Landrace	Europe	Austria	Klausen (Bad Gleichenberg)		Burgenland	46.9	15.88
69	PHA8340-E-AUS		IPK	PHAS 8340	P. coccineus	bicolor	Landrace	Europe	Austria	Klausen (Bad Gleichenberg)		Burgenland	46.9	15.88
70	PHA8341-E-AUS		IPK	PHAS 8341	P. coccineus	bicolor	Landrace	Europe	Austria	Misselsdorf		Burgenland	46.72	15.79
71	PHA8342-E-AUS		IPK	PHAS 8342	P. coccineus	coccineus	Landrace	Europe	Austria	Waltra (St. Anna)		Burgenland	46.85	15.97
72	PHA8349-E-AUS		IPK	PHAS 8349	P. coccineus	coccineus	Landrace	Europe	Austria	Unterwart		Burgenland
73	PHA8361-E-AUS		IPK	PHAS 8361	P. coccineus	coccineus	Landrace	Europe	Austria	St. Martin/Wart		Burgenland	47.3	16.23
74	PHA8363-E-AUS		IPK	PHAS 8363	P. coccineus	bicolor	Landrace	Europe	Austria	Eichberg		Burgenland
75	PHA8364-E-AUS		IPK	PHAS 8364	P. coccineus	coccineus	Landrace	Europe	Austria	Misselsdorf		Burgenland	46.72	15.79
76	PHA8381-E-AUS		IPK	PHAS 8381	P. coccineus	coccineus	Landrace	Europe	Austria	i Löffelbach			47.27	15.93
77	PHA8388-E-AUS		IPK	PHAS 8388	P. coccineus	albiflorus	Landrace	Europe	Austria	Krast (Oberhaag)		Burgenland	46.67	15.37
78	PHA8393-E-AUS		IPK	PHAS 8393	P. coccineus	coccineus	Landrace	Europe	Austria	Misselsdorf		Burgenland	46.72	15.79
79	PHA8394-E-AUS		IPK	PHAS 8394	P. coccineus	coccineus	Landrace	Europe	Austria	St. Martin/Wart		Burgenland	47.3	16.23
80	PHA8410-E-AUS		IPK	PHAS 8410	P. coccineus	albiflorus	Landrace	Europe	Austria	St. Martin/Wart		Burgenland	47.3	16.23
81	PHA8416-E-AUS		IPK	PHAS 8416	P. coccineus	bicolor	Landrace	Europe	Austria	Gschmaier			47.08	15.93
82	PHA798-E-BUL		IPK	PHAS 798	P. coccineus	albiflorus	Landrace	Europe	Bulgaria
83	PHA8006-E-BUL		IPK	PHAS 8006	P. coccineus	albiflorus	Landrace	Europe	Bulgaria
84	PHA8007-E-BUL		IPK	PHAS 8007	P. coccineus	coccineus	Landrace	Europe	Bulgaria
85	PHA8098-E-BUL		IPK	PHAS 8098	P. coccineus	albiflorus	Landrace	Europe	Bulgaria
86	PHA8099-E-BUL		IPK	PHAS 8099	P. coccineus	albiflorus	Landrace	Europe	Bulgaria
87	PHA8140-E-BUL		IPK	PHAS 8140	P. coccineus	albiflorus	Landrace	Europe	Bulgaria
88	PHA8141-E-BUL		IPK	PHAS 8141	P. coccineus	coccineus	Landrace	Europe	Bulgaria
89	PHA8353-E-BUL		IPK	PHAS 8353	P. coccineus	albiflorus	Landrace	Europe	Bulgaria	Taza near Kazanlak
90	PHA8414-E-BUL		IPK	PHAS 8414	P. coccineus	albiflorus	Landrace	Europe	Bulgaria	Smoljan			41.57	24.75	800
91	PHA8415-E-BUL		IPK	PHAS 8415	P. coccineus	albiflorus	Landrace	Europe	Bulgaria	Smoljan			41.57	24.75	800
92	PHA8411-E-CRT		IPK	PHAS 8411	P. coccineus	albiflorus	Landrace	Europe	Croatia	Kostanjevac		Zumberak
93	PHA8412-E-CRT		IPK	PHAS 8412	P. coccineus	albiflorus	Landrace	Europe	Croatia	Berdiki 24		Zumberak
94	PHA8413-E-CRT		IPK	PHAS 8413	P. coccineus	albiflorus	Landrace	Europe	Croatia
95	PHA8190-E-GEO		IPK	PHAS 8190	P. coccineus	coccineus	Landrace	Europe	Georgia		Svaneti
96	PHA8191-E-GEO		IPK	PHAS 8191	P. coccineus	coccineus	Landrace	Europe	Georgia		Svaneti
97	PHA8192-E-GEO		IPK	PHAS 8192	P. coccineus	coccineus	Landrace	Europe	Georgia	Ckumi SW Cageri	Lechkhumi	Cageri	42.62	42.66	650
98	PHA8202-E-GEO	Y	IPK	PHAS 8202	P. coccineus	coccineus	Landrace	Europe	Georgia	Zamusi	Upper Svaneti	Mestia	43.03	42.72	1416
99	PHA8241-E-GEO		IPK	PHAS 8241	P. coccineus	albiflorus	Landrace	Europe	Georgia	Kobalauri	Adjara	Kobuleti
100	PHA8242-E-GEO		IPK	PHAS 8242	P. coccineus	coccineus	Landrace	Europe	Georgia	Kobalauri	Adjara	Kobuleti
101	PHA8243-E-GEO	Y	IPK	PHAS 8243	P. coccineus	coccineus	Landrace	Europe	Georgia	Chino	Adjara	Kobuleti	41.75	42.13	1684
102	PHA8244-E-GEO		IPK	PHAS 8244	P. coccineus	coccineus	Landrace	Europe	Georgia	Chada (Beniantbegoni)		Dusheti	42.42	44.6	1750
103	PHA8268-E-GEO		IPK	PHAS 8268	P. coccineus	coccineus	Landrace	Europe	Georgia	Chada (Rostiani)		Dusheti			1630
104	PHA8286-E-GEO		IPK	PHAS 8286	P. coccineus	coccineus	Landrace	Europe	Georgia	Nukriani			41.61	45.89	1000
105	PHA8287-E-GEO	Y	IPK	PHAS 8287	P. coccineus	coccineus	Landrace	Europe	Georgia	Kobuleti	Adjara	Kobuleti	41.78	41.87	210
106	PHA8293-E-GEO	Y	IPK	PHAS 8293	P. coccineus	coccineus	Landrace	Europe	Georgia	Ceremi	Kakheti	Gurdjaani	41.73	45.78	900
107	PHA8294-E-GEO	Y	IPK	PHAS 8294	P. coccineus	albiflorus	Landrace	Europe	Georgia	Karabulachi	Lower Kartli	Dmanisi	41.32	44.35	1340
108	PHA8295-E-GEO	Y	IPK	PHAS 8295	P. coccineus	coccineus	Landrace	Europe	Georgia	Manglisi	Tetri-Kcaro	Abasish	41.68	44.37	1250
109	PHA8312-E-GEO		IPK	PHAS 8312	P. coccineus	albiflorus	Landrace	Europe	Georgia	Tbilisi
110	PHA8334-E-GEO	Y	IPK	PHAS 8334	P. coccineus	albiflorus	Landrace	Europe	Georgia	Chada (Rostiani)		Dusheti	42.45	44.52	1630
111	PHA8358-E-GEO		IPK	PHAS 8358	P. coccineus	coccineus	Landrace	Europe	Georgia	Srednyaya Mtsara		Novyj Afon	43.14	40.79	180
112	PHA8360-E-GEO	Y	IPK	PHAS 8360	P. coccineus	coccineus	Landrace	Europe	Georgia	Zeda-Adzi	Adjara	Kobuleti	42.38	42.25	7
113	PHA8370-E-GEO	Y	IPK	PHAS 8370	P. coccineus	coccineus	Landrace	Europe	Georgia	Tbilisi			41.72	44.78	404
114	PHA8386-E-GEO		IPK	PHAS 8386	P. coccineus	albiflorus	Landrace	Europe	Georgia	Karabulachi	Lower Kartli	Dmanisi	41.45	44.18	1340
115	PHA8387-E-GEO	Y	IPK	PHAS 8387	P. coccineus	coccineus	Landrace	Europe	Georgia	Korinta	South Ossetia	Leningory	42.18	44.48	1000
116	PHA8395-E-GEO	Y	IPK	PHAS 8395	P. coccineus	coccineus	Landrace	Europe	Georgia	Kobalauri	Adjara	Kobuleti	41.77	41.97	568
117	PHA8369-E-GEO		IPK	PHAS 8369	P. coccineus	albiflorus	Landrace	Europe	Georgia	Ceremi	Kakheti	Gurdjaani	41.74	45.61	900
118	PHA8087-E-GER		IPK	PHAS 8087	P. coccineus	coccineus	Landrace	Europe	Germany
119	PHA8097-E-GER		IPK	PHAS 8097	P. coccineus	albiflorus	Landrace	Europe	Germany	Altenhain
120	PHA8100-E-GER	Y	IPK	PHAS 8100	P. coccineus	coccineus	Landrace	Europe	Germany	Falkensee		Brandenburg	52.57	13.07	32
121	PHA8106-E-GER	Y	IPK	PHAS 8106	P. coccineus	coccineus	Landrace	Europe	Germany	Zwickau		Sachsen	50.72	12.5	301
122	PHA8115-E-GER		IPK	PHAS 8115	P. coccineus	coccineus	Landrace	Europe	Germany
123	PHA8138-E-GER		IPK	PHAS 8138	P. coccineus	albiflorus	Landrace	Europe	Germany	Sohland/Spree			51.04	14.42
124	PHA8139-E-GER		IPK	PHAS 8139	P. coccineus	coccineus	Landrace	Europe	Germany	Sohland/Spree			51.04	14.42
125	PHA8160-E-GER		IPK	PHAS 8160	P. coccineus	coccineus	Landrace	Europe	Germany	Sohland/Spree			51.04	14.42
126	PHA8161-E-GER	Y	IPK	PHAS 8161	P. coccineus	coccineus	Landrace	Europe	Germany	Sohland/Spree		Sachsen	51.03	14.42	301
127	PHA8179-E-GER	Y	IPK	PHAS 8179	P. coccineus	coccineus	Landrace	Europe	Germany	Eisdorf		Sachsen	51.28	12.32	108
128	PHA8181-E-GER		IPK	PHAS 8181	P. coccineus	coccineus	Landrace	Europe	Germany	Zwickau		Sachsen	50.72	12.48
129	PHA8182-E-GER		IPK	PHAS 8182	P. coccineus	coccineus	Landrace	Europe	Germany	Zwickau		Sachsen	50.72	12.48
130	PHA8183-E-GER		IPK	PHAS 8183	P. coccineus	coccineus	Landrace	Europe	Germany
131	PHA8217-E-GER		IPK	PHAS 8217	P. coccineus	albiflorus	Landrace	Europe	Germany
132	20199-E-HUN	Y	RCA	RCAT020199	P. coccineus		Landrace	Europe	Hungary	Szentbekkalla		Veszprem	46.87	17.57	124
133	20068-E-HUN	Y	RCA	RCAT020068	P. coccineus		Landrace	Europe	Hungary	Szabadszallas		Bacs-Kiskun	46.87	19.22	83
134	20952-E-HUN	Y	RCA	RCAT020952	P. coccineus		Landrace	Europe	Hungary	Bokros		Bacs-Bacsbokod	47.03	19.8	92
135	21420-E-HUN	Y	RCA	RCAT021420	P. coccineus		Landrace	Europe	Hungary	Keszeg		Nograd	47.82	19.25	328
136	72860-E-HUN	Y	RCA	RCAT072860	P. coccineus		Landrace	Europe	Hungary	Tunyogmatolcs Fulesd		Szabolcs-Szatmar-Bereg	48.01	22.7	101
137	21417-E-HUN	Y	RCA	RCAT021417	P. coccineus		Landrace	Europe	Hungary	Sonkad		Szabolcs-Szatmar-Bereg	48.03	22.75	112
138	20338-E-HUN	Y	RCA	RCAT020338	P. coccineus		Landrace	Europe	Hungary	Tiszakarad		Borsod-Adauj-Zemplem	48.2	21.72	83
139	PHA801-E-ITA	Y	IPK	PHAS 801	P. coccineus	albiflorus	Landrace	Europe	Italy	Santuario di Polsi	Reggio Calabria	Calabria	38.17	15.87	850
140	PHA803-E-ITA	Y	IPK	PHAS 803	P. coccineus	albiflorus	Landrace	Europe	Italy	Aprigliano	Cosenza	Calabria	39.22	16.32	720
141	PHA8084-E-ITA		IPK	PHAS 8084	P. coccineus	albiflorus	Landrace	Europe	Italy
142	PHA8165-E-ITA		IPK	PHAS 8165	P. coccineus	coccineus	Landrace	Europe	Italy	San Marco di. Cavoti			41.32	14.92	600
143	PHA8166-E-ITA	Y	IPK	PHAS 8166	P. coccineus	coccineus	Landrace	Europe	Italy	San Marco di. Cavoti	Benevento	Campania	41.28	14.87	600
144	PHA8203-E-ITA	Y	IPK	PHAS 8203	P. coccineus	albiflorus	Landrace	Europe	Italy	Monteroduni	Isernia	Molise	41.52	14.17	170
145	PHA8229-E-ITA	Y	IPK	PHAS 8229	P. coccineus	albiflorus	Landrace	Europe	Italy	Cavallerizzo-Cerzeto	Cosenza	Calabria	39.5	16.12	550
146	PHA8277-E-ITA	Y	IPK	PHAS 8277	P. coccineus	albiflorus	Landrace	Europe	Italy	Serra S. Bruno	ViboValenzia	Calabria	38.57	16.32	800
147	PHA8284-E-ITA	Y	IPK	PHAS 8284	P. coccineus	coccineus	Landrace	Europe	Italy	Scanno	L'Aquila	Abruzzo	41.88	13.87	750
148	PHA8285-E-ITA	Y	IPK	PHAS 8285	P. coccineus	albiflorus	Landrace	Europe	Italy	Campo di Giove	L'Aquila	Abruzzo	42.02	14.5	1040
149	PHA8291-E-ITA		IPK	PHAS 8291	P. coccineus	albiflorus	Landrace	Europe	Italy	Castel del Giudice			41.85	14.23	800
150	PHA8313-E-ITA	Y	IPK	PHAS 8313	P. coccineus	albiflorus	Landrace	Europe	Italy	Tarvisio	Udine	Friuli Venezia Giulia	46.5	13.58	750
151	PHA8347-E-ITA		IPK	PHAS 8347	P. coccineus	coccineus	Landrace	Europe	Italy		Serra S. Bruno	Calabria	38.58	16.33	800
152	PHA8350-E-ITA		IPK	PHAS 8350	P. coccineus	coccineus	Landrace	Europe	Italy	Scanno					750
153	PHA8351-E-ITA		IPK	PHAS 8351	P. coccineus	bicolor	Landrace	Europe	Italy	Astrio (Breno) BS		Brescia	45.94	10.32	800
154	PHA8352-E-ITA	Y	IPK	PHAS 8352	P. coccineus	albiflorus	Landrace	Europe	Italy	Fossano	Cuneo	Piemonte	38.02	15.77	400
155	PHA8355-E-ITA	Y	IPK	PHAS 8355	P. coccineus	albiflorus	Landrace	Europe	Italy	Porretta Terme	Bologna	Emilia-Romagna	44.13	10.97	380
156	PHA8356-E-ITA		IPK	PHAS 8356	P. coccineus	coccineus	Landrace	Europe	Italy	Castel del Giudice			41.85	14.23	800
157	PHA8357-E-ITA		IPK	PHAS 8357	P. coccineus	albiflorus	Landrace	Europe	Italy	Astrio (Breno) BS		Brescia	45.94	10.32	800
158	PHA8365-E-ITA		IPK	PHAS 8365	P. coccineus	coccineus	Landrace	Europe	Italy	Serra S. Bruno		Calabria	38.58	16.33	800
159	PHA8366-E-ITA		IPK	PHAS 8366	P. coccineus	coccineus	Landrace	Europe	Italy	Castel del Giudice			41.85	14.23	800
160	PHA8371-E-ITA		IPK	PHAS 8371	P. coccineus	albiflorus	Landrace	Europe	Italy	Porretta Terme (Bo.)		Emilia-Romagna	44.15	10.98	380
161	PHA8383-E-ITA	Y	IPK	PHAS 8383	P. coccineus	bicolor	Landrace	Europe	Italy	S. Marzano di San Giuseppe	Taranto	Puglia	40.45	17.5	150
162	PHA8389-E-ITA	Y	IPK	PHAS 8389	P. coccineus	albiflorus	Landrace	Europe	Italy	Castel del Giudice	Isernia	Molise	41.85	14.22	800
163	PHA8396-E-ITA	Y	IPK	PHAS 8396	P. coccineus	bicolor	Landrace	Europe	Italy	Platischis	Udine	Friuli Venezia Giulia	46.23	13.38	660
164	VARI6-E-ITA						Landrace	Europe	Italy
165	VARI7-E-ITA						Landrace	Europe	Italy
166	VARI8-E-ITA						Landrace	Europe	Italy
167	VARI9-E-ITA						Landrace	Europe	Italy
168	PHA8085-E-MDA		IPK	PHAS 8085	P. coccineus	albiflorus	Landrace	Europe	Moldova
169	PHA8083-E-MDA		IPK	PHAS 8083	P. coccineus	albiflorus	Landrace	Europe	Moldova
170	PHA8270-E-AUS		IPK	PHAS 8270	P. coccineus	albiflorus	Landrace	Europe	No info
171	PHA260-E-ITA		IPK	PHAS 260	P. coccineus	bicolor	Cultivar	Europe	No info
172	PHA799-E-NC		IPK	PHAS 799	P. coccineus	coccineus	Landrace	Europe	No info
173	PHA800-E-NC		IPK	PHAS 800	P. coccineus	albiflorus	Landrace	Europe	No info
174	PHA8001-E-NC		IPK	PHAS 8001	P. coccineus	coccineus	Landrace	Europe	No info
175	PHA8003-E-NC		IPK	PHAS 8003	P. coccineus	rubronanus	Landrace	Europe	No info
176	PHA8004-E-NC		IPK	PHAS 8004	P. coccineus	coccineus	Landrace	Europe	No info
177	PHA8005-E-NC		IPK	PHAS 8005	P. coccineus	albiflorus	Landrace	Europe	No info
178	PHA8013-E-NC		IPK	PHAS 8013	P. coccineus	bicolor	Landrace	Europe	No info
179	PHA8014-E-NC		IPK	PHAS 8014	P. coccineus	coccineus	Landrace	Europe	No info
180	PHA8015-E-NC		IPK	PHAS 8015	P. coccineus	coccineus	Landrace	Europe	No info
181	PHA8016-E-NC		IPK	PHAS 8016	P. coccineus	coccineus	Landrace	Europe	No info
182	PHA804-E-NC		IPK	PHAS 804	P. coccineus	bicolor	Landrace	Europe	No info
183	PHA8080-E-NC		IPK	PHAS 8080	P. coccineus	albiflorus	Landrace	Europe	No info
184	PHA8081-E-NC		IPK	PHAS 8081	P. coccineus	coccineus	Landrace	Europe	No info
185	PHA8082-E-NC		IPK	PHAS 8082	P. coccineus	coccineus	Landrace	Europe	No info
186	PHA816-E-NC		IPK	PHAS 816	P. coccineus	albiflorus	Landrace	Europe	No info
187	PHA817-E-NC		IPK	PHAS 817	P. coccineus	coccineus	Landrace	Europe	No info
188	PHA8184-E-NC		IPK	PHAS 8184	P. coccineus	coccineus	Landrace	Europe	No info
189	PHA8354-E-NC		IPK	PHAS 8354	P. coccineus	albiflorus	Landrace	Europe	No info
190	PHA8362-E-NC		IPK	PHAS 8362	P. coccineus	coccineus	Landrace	Europe	No info
191	PHA8117-E-POL		IPK	PHAS 8117	P. coccineus	albiflorus	Landrace	Europe	Poland	Rowne
192	PHA8118-E-POL	Y	IPK	PHAS 8118	P. coccineus	albiflorus	Landrace	Europe	Poland	Rowne			49.57	21.67	326
193	PHA8119-E-POL	Y	IPK	PHAS 8119	P. coccineus	albiflorus	Landrace	Europe	Poland	Pisarzowa E Limanowa			49.7	20.5	488
194	PHA8120-E-POL		IPK	PHAS 8120	P. coccineus	coccineus	Landrace	Europe	Poland	Pisarzowa E Limanowa
195	PHA8121-E-POL	Y	IPK	PHAS 8121	P. coccineus	albiflorus	Landrace	Europe	Poland	Strosza bei Wilkowisko			51.37	16.82	101
196	PHA8122-E-POL	Y	IPK	PHAS 8122	P. coccineus	albiflorus	Landrace	Europe	Poland	Sromowce Wyznie			49.42	20.35	550
197	PHA8145-E-POL	Y	IPK	PHAS 8145	P. coccineus	coccineus	Landrace	Europe	Poland	Lublin, Polen			51.25	22.57	169
198	PHA8193-E-POL	Y	IPK	PHAS 8193	P. coccineus	coccineus	Landrace	Europe	Poland	Slopnice W Limanowa			49.7	20.42	442
199	PHA8204-E-POL	Y	IPK	PHAS 8204	P. coccineus	albiflorus	Landrace	Europe	Poland	Siedliska Kolonia			50.87	23.42	221
200	PHA8205-E-POL		IPK	PHAS 8205	P. coccineus	albiflorus	Landrace	Europe	Poland	Siedliska Kolonia
201	00634-BPGV	Y	BPGV	00634-BPGV	P. coccineus		Landrace	Europe	Portugal	Aljejur	Faro	Algarve	37.33	-8.78	120
202	04901-BPGV	Y	BPGV	04901-BPGV	P. coccineus		Landrace	Europe	Portugal	Fernao Joanes	Guarda	Centro	40.48	-7.33	930
203	06228-BPGV	Y	BPGV	06228-BPGV	P. coccineus		Landrace	Europe	Portugal	Satao	Viseu		40.8	-7.7	650
204	00709-BPGV	Y	BPGV	00709-BPGV	P. coccineus		Landrace	Europe	Portugal	Penedono	Viseu		40.98	-7.38	890
205	03067-BPGV	Y	BPGV	03067-BPGV	P. coccineus		Landrace	Europe	Portugal	Ribeira de Pena	Vila Real		41.42	-7.83	840
206	01651-BPGV	Y	BPGV	01651-BPGV	P. coccineus		Landrace	Europe	Portugal	Ponte de Lima	Viana do Castelo		41.77	-7.55	50
207	01352-BPGV	Y	BPGV	01352-BPGV	P. coccineus		Landrace	Europe	Portugal	Chaves	Vila Real		41.82	-7.33	840
208	07546-BPGV	Y	BPGV	07546-BPGV	P. coccineus		Landrace	Europe	Portugal	Sistelo-Arcos de Valdevez	Viana do Castelo		41.97	-7.32	500
209	PHA8194-E-POL		IPK	PHAS 8194	P. coccineus	coccineus	Landrace	Europe	Romania	Bica	Cluj
210	PHA8195-E-ROM		IPK	PHAS 8195	P. coccineus	bicolor	Landrace	Europe	Romania	Bica	Cluj
211	PHA8196-E-ROM	Y	IPK	PHAS 8196	P. coccineus	albiflorus	Landrace	Europe	Romania	Bica, Distr. Cluj			46.77	23.07	753
212	PHA8227-E-ROM		IPK	PHAS 8227	P. coccineus	coccineus	Landrace	Europe	Romania	Tureni	Cluj
213	PHA8228-E-ROM	Y	IPK	PHAS 8228	P. coccineus	bicolor	Landrace	Europe	Romania	Tureni	Cluj		46.62	23.68	516
214	PHA8403-E-ROM	Y	IPK	PHAS 8403	P. coccineus	albiflorus	Landrace	Europe	Romania	Vicovu de jos			47.88	25.72	560
215	PHA8408-E-ROM	Y	IPK	PHAS 8408	P. coccineus	coccineus	Landrace	Europe	Romania	Molid			47.57	25.72	800
216	13725-E-ROM	Y	SVGB	13725	P. coccineus		Landrace	Europe	Romania	Calinesti		Maramures	47.78	23.97	530
217	13720-E-ROM	Y	SVGB	13720	P. coccineus		Landrace	Europe	Romania	Vadu Izei		Maramures	47.9	23.98	370
218	13672-E-ROM	Y	SVGB	13672	P. coccineus		Landrace	Europe	Romania	Bistra		Maramures	47.87	24.22	530
219	13718-E-ROM	Y	SVGB	13718	P. coccineus		Landrace	Europe	Romania	Costiui		Maramures	47.88	24.05	610
220	13625-E-ROM	Y	SVGB	13625	P. coccineus		Landrace	Europe	Romania	Ruscova		Maramures	47.8	24.28	630
221	13832-E-ROM	Y	SVGB	13832	P. coccineus		Landrace	Europe	Romania	Salistea de Sus		Maramures	47.67	24.35	600
222	PHA8375-E-ROM		IPK	PHAS 8375	P. coccineus	albiflorus	Landrace	Europe	Romania	Moisei		Maramures			800
223	PHA8376-E-ROM		IPK	PHAS 8376	P. coccineus	albiflorus	Landrace	Europe	Romania	Bogdan Voda		Maramures			500
224	PHA8377-E-ROM		IPK	PHAS 8377	P. coccineus	albiflorus	Landrace	Europe	Romania	Sapinta		Maramures
225	PHA8378-E-ROM		IPK	PHAS 8378	P. coccineus	albiflorus	Landrace	Europe	Romania	Poienile de Sub Munte		Maramures			600
226	PHA8379-E-ROM		IPK	PHAS 8379	P. coccineus	albiflorus	Landrace	Europe	Romania	Posaga de Sus	Muntii Apuseni	Cimpeni			500
227	PHA8402-E-ROM		IPK	PHAS 8402	P. coccineus	coccineus	Landrace	Europe	Romania	Vicovu de jos					560
228	PHA8404-E-ROM		IPK	PHAS 8404	P. coccineus	coccineus	Landrace	Europe	Romania	Moisei		Maramures			800
229	PHA8405-E-ROM		IPK	PHAS 8405	P. coccineus	bicolor	Landrace	Europe	Romania	Sapinta		Maramures
230	PHA8406-E-ROM		IPK	PHAS 8406	P. coccineus	coccineus	Landrace	Europe	Romania	Poienile de Sub Munte		Maramures			600
231	PHA8407-E-ROM		IPK	PHAS 8407	P. coccineus	albiflorus	Landrace	Europe	Romania	Molid					800
232	PHA8409-E-ROM		IPK	PHAS 8409	P. coccineus	coccineus	Landrace	Europe	Romania	Poienile de Sub Munte		Maramures			600
233	PHA8101-E-SLK		IPK	PHAS 8101	P. coccineus	bicolor	Landrace	Europe	Slovakia	Ostry Grún			48.56	18.67
234	PHA8103-E-SLK		IPK	PHAS 8103	P. coccineus	coccineus	Landrace	Europe	Slovakia	Nová Bana			48.42	18.64
235	PHA8104-E-SLK		IPK	PHAS 8104	P. coccineus	bicolor	Landrace	Europe	Slovakia	Nová Bana			48.42	18.64
236	PHA8107-E-SLK		IPK	PHAS 8107	P. coccineus	coccineus	Landrace	Europe	Slovakia	Ostry Grún			48.56	18.67
237	PHA8114-E-SLK	Y	IPK	PHAS 8114	P. coccineus	coccineus	Landrace	Europe	Slovakia	Gaboltov			49.37	21.13	437
238	PHA8137-E-SLK		IPK	PHAS 8137	P. coccineus	albiflorus	Landrace	Europe	Slovakia	Nová Bana			48.42	18.64
239	PHA8154-E-SLK		IPK	PHAS 8154	P. coccineus	coccineus	Landrace	Europe	Slovakia	Ostry Grún			48.56	18.67
240	PHA8155-E-SLK		IPK	PHAS 8155	P. coccineus	bicolor	Landrace	Europe	Slovakia	Ostry Grún			48.56	18.67
241	PHA8156-E-SLK		IPK	PHAS 8156	P. coccineus	bicolor	Landrace	Europe	Slovakia	Dolné Mladunice			48.34	19.13
242	PHA8157-E-SLK		IPK	PHAS 8157	P. coccineus	bicolor	Landrace	Europe	Slovakia	Ostry Grún			48.56	18.67
243	PHA8158-E-SLK		IPK	PHAS 8158	P. coccineus	coccineus	Landrace	Europe	Slovakia	Ostry Grún			48.56	18.67
244	PHA8159-E-SLK	Y	IPK	PHAS 8159	P. coccineus	bicolor	Landrace	Europe	Slovakia	Ostry Grún			48.57	18.67	477
245	PHA8162-E-SLK		IPK	PHAS 8162	P. coccineus	coccineus	Landrace	Europe	Slovakia
246	PHA8163-E-SLK		IPK	PHAS 8163	P. coccineus	bicolor	Landrace	Europe	Slovakia
247	PHA8164-E-SLK		IPK	PHAS 8164	P. coccineus	bicolor	Landrace	Europe	Slovakia	Zvala			49.13	22.24
248	PHA8168-E-SLK		IPK	PHAS 8168	P. coccineus	coccineus	Landrace	Europe	Slovakia	Dolné Mladunice			48.34	19.13
249	PHA8169-E-SLK		IPK	PHAS 8169	P. coccineus	coccineus	Landrace	Europe	Slovakia	Dolné Mladunice			48.34	19.13
250	PHA8170-E-SLK		IPK	PHAS 8170	P. coccineus	bicolor	Landrace	Europe	Slovakia	Dolné Mladunice			48.34	19.13
251	PHA8171-E-SLK		IPK	PHAS 8171	P. coccineus	bicolor	Landrace	Europe	Slovakia	Petrova Lehota			48.87	18.18
252	PHA8172-E-SLK		IPK	PHAS 8172	P. coccineus	bicolor	Landrace	Europe	Slovakia	Petrova Lehota			48.87	18.18
253	PHA8174-E-SLK		IPK	PHAS 8174	P. coccineus	albiflorus	Landrace	Europe	Slovakia	Vel. Kosecké Podhradie			48.98	18.33
254	PHA8175-E-SLK	Y	IPK	PHAS 8175	P. coccineus	albiflorus	Landrace	Europe	Slovakia	Cierna Lehota			48.32	18	225
255	PHA8185-E-SLK		IPK	PHAS 8185	P. coccineus	coccineus	Landrace	Europe	Slovakia	Nová Bana			48.42	18.64
256	PHA8186-E-SLK		IPK	PHAS 8186	P. coccineus	coccineus	Landrace	Europe	Slovakia	Zvala			49.13	22.24
257	PHA8187-E-SLK		IPK	PHAS 8187	P. coccineus	coccineus	Landrace	Europe	Slovakia	Zvala			49.13	22.24
258	PHA8188-E-SLK		IPK	PHAS 8188	P. coccineus	albiflorus	Landrace	Europe	Slovakia	Zvala			49.13	22.24
259	PHA8189-E-SLK	Y	IPK	PHAS 8189	P. coccineus	bicolor	Landrace	Europe	Slovakia	Zvala			49.12	22.22	521
260	PHA8212-E-SLK	Y	IPK	PHAS 8212	P. coccineus	bicolor	Landrace	Europe	Slovakia	Vel. Kosecké Podhradie			48.67	18.62	538
261	PHA8214-E-SLK	Y	IPK	PHAS 8214	P. coccineus	albiflorus	Landrace	Europe	Slovakia	Hvozdnica			48.47	18.68	273
262	PHA8215-E-SLK	Y	IPK	PHAS 8215	P. coccineus	coccineus	Landrace	Europe	Slovakia	Podbranc			48.72	17.47	392
263	PHA8216-E-SLK		IPK	PHAS 8216	P. coccineus	coccineus	Landrace	Europe	Slovakia	Podbranc			48.73	17.45
264	PHA8298-E-SLK	Y	IPK	PHAS 8298	P. coccineus	bicolor	Landrace	Europe	Slovakia	Petrova Lehota			48.72	17.47	392
265	PHA8314-E-SLK	Y	IPK	PHAS 8314	P. coccineus	coccineus	Landrace	Europe	Slovakia	Petrova Lehota			48.87	18.17	374
266	PHA8315-E-SLK		IPK	PHAS 8315	P. coccineus	coccineus	Landrace	Europe	Slovakia	Petrova Lehota			48.87	18.18
267	PHA8316-E-SLK		IPK	PHAS 8316	P. coccineus	coccineus	Landrace	Europe	Slovakia	Vel. Kosecké Podhradie			48.98	18.33
268	PHA168-E-SLO				P. coccineus		Landrace	Europe	Slovenia
269	PHA172-E-SLO	Y		SRGB172	P. coccineus		Landrace	Europe	Slovenia	Terbegovci	Scavnici	Obcina Benedikt	46.61	15.88	280
270	PHA220-E-SLO				P. coccineus		Landrace	Europe	Slovenia
271	PHA507-E-SLO				P. coccineus		Landrace	Europe	Slovenia
272	PHA522-E-SLO				P. coccineus		Landrace	Europe	Slovenia
273	PHA528-E-SLO				P. coccineus		Landrace	Europe	Slovenia
274	PHA854-E-SLO				P. coccineus		Landrace	Europe	Slovenia
275	PHA856a-E-SLO				P. coccineus		Landrace	Europe	Slovenia
276	BG5485-E-ESP	Y	INIA	BG-005485	P. coccineus		Landrace	Europe	Spain	Mutxamel	Alicante	Valencia	38.4	-0.01	64
277	BG3135-E-ESP	Y	INIA	BG-003135	P. coccineus		Landrace	Europe	Spain	Jomezana de Abajo	Lena	Asturias	43.05	-5.85	702
278	BG3244-E-ESP	Y	INIA	BG-003244	P. coccineus		Landrace	Europe	Spain	Llanos de Someron	Lena	Asturias	43.05	-5.78	865
279	BG3255-E-ESP	Y	INIA	BG-003255	P. coccineus		Landrace	Europe	Spain	Valle de Lago	Somiedo	Asturias	43.08	-6.18	1427
280	BG3575-E-ESP	Y	INIA	BG-003575	P. coccineus		Landrace	Europe	Spain	Aqueras	Quiros	Asturias	43.2	-6	376
281	BG3201-E-ESP	Y	INIA	BG-003201	P. coccineus		Landrace	Europe	Spain	Coalla	Grado	Asturias	43.33	-6.05	176
282	BG31002-E-ESP				P. coccineus		Landrace	Europe	Spain
283	BG3085-E-ESP	Y	INIA	BG-003085	P. coccineus		Landrace	Europe	Spain	San Estaban	Coana	Asturias	43.52	-6.83	680
284	BG8994-E-ESP	Y	INIA	BG-008994	P. coccineus		Landrace	Europe	Spain	El Barco de Avila	Avila	Castillia y leon	40.35	-5.52	1006
285	BG4480-E-ESP	Y	INIA	BG-004480	P. coccineus		Landrace	Europe	Spain	Horcajo de la Ribera, Santiago del Tormes	Avila	Castillia y leon	40.37	-5.37	1493
286	BG3086-E-ESP	Y	INIA	BG-003086	P. coccineus		Landrace	Europe	Spain	San Andrei, Monfero	La Coruna	Galizia	43.38	-8.02	391
287	BG3697-E-ESP	Y	INIA	BG-003697	P. coccineus		Landrace	Europe	Spain	La Baneza	Leon	Castillia y leon	42.28	-5.88	770
288	BG3960-E-ESP	Y	INIA	BG-003960	P. coccineus		Landrace	Europe	Spain	Villameca, Quintana del Castillo	Leon	Castillia y leon	42.63	-6.07	1000
289	BG025196-E-ESP	Y	INIA	BG-025196	P. coccineus		Landrace	Europe	Spain	La Mata de Monteagudo, Valderrueda	Leon	Castillia y leon	42.83	-5.05	1402
290	BG3072-E-ESP	Y	INIA	BG-003072	P. coccineus		Landrace	Europe	Spain	Vilaseca , Negueira de Muniz	Lugo	Galizia	43.12	-6.92	260
291	BG3082-E-ESP	Y	INIA	BG-003082	P. coccineus		Landrace	Europe	Spain	Estelo, Mondonedo	Lugo	Asturias	43.42	-7.43	469
292	BG3548-E-ESP	Y	INIA	BG-003548	P. coccineus		Landrace	Europe	Spain	Bacoi, Alfoz	Lugo	Galizia	43.55	-7.38	77
293	BG2191-E-ESP	Y	INIA	BG-002191	P. coccineus		Landrace	Europe	Spain	Portage,Lobios	Orense	Galizia	41.95	-8.05	330
294	BG2212-E-ESP	Y	INIA	BG-002212	P. coccineus		Landrace	Europe	Spain	Medos,San Juan del Rio, Rio	Orense	Galizia	42.4	-7.32	700
295	BG1514-E-ESP	Y	INIA	BG-001514	P. coccineus		Landrace	Europe	Spain	Bejar	Salamanca	Castillia y leon	40.38	-5.75	959
296	BG31001-E-ESP	Y	INIA	BG-031001	P. coccineus		Landrace	Europe	Spain	San Ildefonso La Granja	Segovia	Extremedura	41.37	-3.42	1101
297	BG3739-E-ESP	Y	INIA	BG-003739	P. coccineus		Landrace	Europe	Spain	San Ildefonso, La Granja	Segovia	Extremedura	40.88	-4	1101
298	BG3983-E-ESP	Y	INIA	BG-003983	P. coccineus		Landrace	Europe	Spain	El Puente, Galende	Zamora	Castillia y leon	42.1	-6.67	950
299	PHA0127-E-ESP	Y	CSIC	PHA-0127	P. coccineus		Landrace	Europe	Spain	Pineiro de Arcos	Orense	Galizia	42.32	-7.83	326
300	PHA0282-E-ESP	Y	CSIC	PHA-0282	P. coccineus		Landrace	Europe	Spain	Orense	Orense	Galizia	42.32	-7.83	326
301	PHA0469-E-ESP	Y	CSIC	PHA-0469	P. coccineus		Landrace	Europe	Spain	Pontevedra		Galizia	42.42	-8.62	76
302	PHA0344-E-ESP	Y	CSIC	PHA-0344	P. coccineus		Landrace	Europe	Spain	Pontevedra		Galizia	42.63	-8.12	579
303	PHA0175-E-ESP	Y	CSIC	PHA-0175	P. coccineus		Landrace	Europe	Spain	Romaniza, Abadin	Lugo	Galizia	43.38	-7.47	552
304	BG3576-E-ESP	Y	INIA	BG-003576	P. coccineus		Landrace	Europe	Spain	El Salceo,	Pravia	Asturias	43.52	-6.1	35
305	BG25757-E-ESP	Y	INIA	BG-025757	P. coccineus		Landrace	Europe	Spain	Santibanez	Leon	Castillia y leon	40.88	-4	1101
306	BG3089-E-ESP	Y	INIA	BG-003089	P. coccineus		Landrace	Europe	Spain	Arancedo	El Franco	Asturias	43.5	-6.82	202
307	BG3212-E-ESP			BG3212	P. coccineus		Landrace	Europe	Spain
308	PHA0406-E-ESP	Y	CSIC	PHA-0406	P. coccineus		Landrace	Europe	Spain	Villavaler	Pravia	Asturias	43.47	-6.17	204
309	PHA8142-E-NET	Y	IPK	PHAS 8142	P. coccineus	albiflorus	Landrace	Europe	Netherlands	Barnefeld			52.12	5.57	9
310	PHA8143-E-NET		IPK	PHAS 8143	P. coccineus	coccineus	Landrace	Europe	Netherlands
311	PHA8146-E-NET		IPK	PHAS 8146	P. coccineus	albiflorus	Landrace	Europe	Netherlands
312	PHA8167-E-NET		IPK	PHAS 8167	P. coccineus	coccineus	Landrace	Europe	Netherlands	Woubrugge
313	PHA8197-E-NET		IPK	PHAS 8197	P. coccineus	coccineus	Landrace	Europe	Netherlands	Wageningen
314	PHA8198-E-NET		IPK	PHAS 8198	P. coccineus	coccineus	Landrace	Europe	Netherlands	Wageningen
315	PHA8199-E-NET	Y	IPK	PHAS 8199	P. coccineus	albiflorus	Landrace	Europe	Netherlands	Wageningen			51.97	5.9	8
316	PHA8200-E-NET		IPK	PHAS 8200	P. coccineus	coccineus	Landrace	Europe	Netherlands	Woubrugge
317	PHA8201-E-NET		IPK	PHAS 8201	P. coccineus	coccineus	Landrace	Europe	Netherlands	Woubrugge
318	PHA8206-E-NET		IPK	PHAS 8206	P. coccineus	albiflorus	Landrace	Europe	Netherlands	Venray
319	PHA8222-E-NET		IPK	PHAS 8222	P. coccineus	coccineus	Landrace	Europe	Netherlands	Ubachtsberg
320	PHA8223-E-NET	Y	IPK	PHAS 8223	P. coccineus	coccineus	Landrace	Europe	Netherlands	Ubachtsberg			50.85	5.95	160
321	PHA8224-E-NET		IPK	PHAS 8224	P. coccineus	albiflorus	Landrace	Europe	Netherlands	Apeldoorn
322	PHA8225-E-NET		IPK	PHAS 8225	P. coccineus	coccineus	Landrace	Europe	Netherlands	Kapelle
323	PHA8230-E-NET		IPK	PHAS 8230	P. coccineus	coccineus	Landrace	Europe	Netherlands	Kapelle
324	PHA8231-E-NET	Y	IPK	PHAS 8231	P. coccineus	coccineus	Landrace	Europe	Netherlands	Kapelle			51.92	4.58	-2
325	PHA8239-E-NET		IPK	PHAS 8239	P. coccineus	coccineus	Landrace	Europe	Netherlands	Oude Wetering
326	PHA8296-E-NET	Y	IPK	PHAS 8296	P. coccineus	albiflorus	Landrace	Europe	Netherlands	Nederhorst-ten Berg			52.27	5.03	-1
327	PHA8372-E-UKR		IPK	PHAS 8372	P. coccineus	albiflorus	Landrace	Europe	Ukraine	Khmelnyk
328	PHA8373-E-UKR		IPK	PHAS 8373	P. coccineus	bicolor	Landrace	Europe	Ukraine	Khmelnyk
329	PHA8380-E-UKR		IPK	PHAS 8380	P. coccineus	albiflorus	Landrace	Europe	Ukraine	Khmelnyk
330	PHA8390-E-UKR		IPK	PHAS 8390	P. coccineus	coccineus	Landrace	Europe	Ukraine	Khmelnyk
331	PHA8391-E-UKR		IPK	PHAS 8391	P. coccineus	bicolor	Landrace	Europe	Ukraine	Khmelnyk
332	PI273448-AC-ME		USDA	PI273448	P. coccineus		Landrace	Mesoamerica	Mexico
333	PI309694-AC-ME	Y	USDA	PI309694	P. coccineus		Landrace	Mesoamerica	Mexico	Market in Zamora		Michoacan	19.98	-102.27	1593
334	PI311920-AC-ME	Y	USDA	PI311920	P. coccineus		Landrace	Mesoamerica	Mexico	Market in Tehuacan	Tehuacan	Puebla	18.45	-97.37	1660
335	PI311939-AC-ME	Y	USDA	PI311939	P. coccineus		Landrace	Mesoamerica	Mexico	Market in Mendoza		Veracruz-Llave	18.38	-95.35	1000
336	PI311953-AC-ME	Y	USDA	PI311953	P. coccineus		Landrace	Mesoamerica	Mexico	Cordoba		Veracruz	18.9	-96.93	1000
337	PI311977-AC-ME	Y	USDA	PI311977	P. coccineus		Landrace	Mesoamerica	Mexico	Market in Oaxaca		Oaxaca	17.05	-96.72	1660
338	PI311981-AC-ME	Y	USDA	PI311981	P. coccineus		Landrace	Mesoamerica	Mexico	Market in Comitan		Chiapas	16.25	-92.13	2000
339	PI311985-AC-ME	Y	USDA	PI311985	P. coccineus		Landrace	Mesoamerica	Mexico	Comitan	Fronteriza	Chiapas	16.25	-92.13	2000
340	PI312009-AC-ME	Y	USDA	PI312009	P. coccineus		Landrace	Mesoamerica	Mexico	San Cristobal las Casas	Altos	Chiapas	16.27	-92.63	2330
341	PI312013-AC-ME		USDA	PI312013	P. coccineus		Landrace	Mesoamerica	Mexico
342	PI312035-AC-ME	Y	USDA	PI312035	P. coccineus		Landrace	Mesoamerica	Mexico	market in Tuxtla Gutierrez	Centro	Chiapas	16.75	-92.63	2330
343	PI312076-AC-ME	Y	USDA	PI312076	P. coccineus		Landrace	Mesoamerica	Mexico	Market in Mexico City		Federal District	19.42	-99.17	2600
344	PI312080-AC-ME	Y	USDA	PI312080	P. coccineus		Landrace	Mesoamerica	Mexico	Mexico City		Federal district	19.4	-99.15	2530
345	PI313221-AC-ME	Y	USDA	PI313221	P. coccineus		Landrace	Mesoamerica	Mexico	El Colorado-El Jaguey		Aguascalientes	21.75	-102.17	1960
346	PI313497-AC-ME	Y	USDA	PI313497	P. coccineus		Landrace	Mesoamerica	Mexico	San Lucas El Grande		Puebla	19.32	-98.5	2560
347	PI313500-AC-ME	Y	USDA	PI313500	P. coccineus		Landrace	Mesoamerica	Mexico	Palmar de Bravos		Puebla	18.87	-97.6	2180
348	PI313503-AC-ME	Y	USDA	PI313503	P. coccineus		Landrace	Mesoamerica	Mexico	Matamoros		Puebla	18.6	-98.45	1760
349	PI313506-AC-ME	Y	USDA	PI313506	P. coccineus		Landrace	Mesoamerica	Mexico	Hueyapa, Tlatlauqui		Puebla	18.87	-98.67	1660
350	PI325590-AC-ME	Y	USDA	PI325590	P. coccineus		Landrace	Mesoamerica	Mexico	Market in Tehuacan	Tehuacan	Puebla	18.45	-97.38	1554
351	PI325592-AC-ME	Y	USDA	PI325592	P. coccineus		Landrace	Mesoamerica	Mexico	Market in Altotongo		Veracruz	19.77	-97.23	2000
352	PI325594-AC-ME	Y	USDA	PI325594	P. coccineus		Landrace	Mesoamerica	Mexico	Market in Tlatlauquitepec		Puebla	19.85	-97.48	2000
353	PI325595-AC-ME	Y	USDA	PI325595	P. coccineus		Landrace	Mesoamerica	Mexico	Market in Tlatlauquitepec		Puebla	19.85	-97.48	2000
354	PI325596-AC-ME	Y	USDA	PI325596	P. coccineus		Landrace	Mesoamerica	Mexico	Market in Tezuitlan		Puebla	15.17	-92.65	2000
355	PI325597-AC-ME	Y	USDA	PI325597	P. coccineus		Landrace	Mesoamerica	Mexico	Market Tezuitlan		Puebla	15.17	-92.65	2000
356	PI325599-AC-ME	Y	USDA	PI325599	P. coccineus		Landrace	Mesoamerica	Mexico	Ixtlan de Juarez		Oaxaca	17.33	-96.48	2500
357	PI325600-AC-ME	Y	USDA	PI325600	P. coccineus		Landrace	Mesoamerica	Mexico	Ixtlan de Juarez		Oxaca	17.33	-96.48	2500
358	PI325603-AC-ME	Y	USDA	PI325603	P. coccineus		Landrace	Mesoamerica	Mexico	Nacaltepec, 20 miles north of Telixtlahuaca		Oaxaca	17.52	-96.93	2133
359	PI417588-AC-ME	Y	USDA	PI417588	P. coccineus		Landrace	Mesoamerica	Mexico	Perote		Veracruz -	19.52	-97.27	2454
360	PI449381-AC-ME	Y	USDA	PI449381	P. coccineus		Landrace	Mesoamerica	Mexico	Market, Poza Rica		Veracruz	21.27	-98.3	50
361	PI510637-AC-ME	Y	USDA	PI510637	P. coccineus		Landrace	Mesoamerica	Mexico	Market in Durango		Durango	24.02	-104.67	1829
362	PI325589-AC-ME	Y	USDA	PI325589	P. coccineus		Landrace	Mesoamerica	Mexico	Nacaltepec, 20 mile north of Telixtlahuaca		Oaxaca	17.52	-96.92	2133
363	PI309888-AC-COS	Y	USDA	PI309888	P. coccineus		Landrace	Mesoamerica	Costa Rica	Santa Maria de Dota	Dota	San Josè	9.65	-83.97	1663
364	PI309889-AC-COS	Y	USDA	PI309889	P. coccineus		Landrace	Mesoamerica	Costa Rica	Santa Maria de Dota	Dota	San José	9.65	-83.97	1663
365	PI406785-AC-COS	Y	USDA	PI406785	P. coccineus		Landrace	Mesoamerica	Costa Rica	Claude Hope Farm	Cartago	Cartago	9.85	-83.9	1431
366	PI311880-AC-GUA		USDA	PI311880	P. coccineus		Landrace	Mesoamerica	Guatemala
367	PI406936-AC-HON	Y	USDA	PI406936	P. coccineus		Landrace	Mesoamerica	Honduras	Market in	Tegucigalpa	Francisco Morazan	14.1	-87.22	980
368	PI406938-AC-HON	Y	USDA	PI406938	P. coccineus		Landrace	Mesoamerica	Honduras	Market in Tegucigalpa	Tegucigalpa	Francisco Morazan	14.1	-87.22	980
369	PI535279-AC-GUA-W		USDA	PI535279	P. coccineus		Wild	Mesoamerica	Guatemala
370	PI535280-AC-GUA-W	Y	USDA	PI535280	P. coccineus		Wild	Mesoamerica	Guatemala	Crossroads Yepo-Duenos	Sacatepequez	Guatemala	14.52	-90.95	1980
371	PI535284-AC-GUA-W	Y	USDA	PI535284	P. coccineus		Wild	Mesoamerica	Guatemala	Hill to Godinez	Solola	Solola	14.7	-91.1	2310
372	PI535285-AC-GUA-W	Y	USDA	PI535285	P. coccineus		Wild	Mesoamerica	Guatemala	Jalapa-Miramundo	Jalapa	Jalapa	14.55	-90.1	2100
373	PI535287-AC-GUA-W	Y	USDA	PI535287	P. coccineus		Wild	Mesoamerica	Guatemala	Road Volcán de Agua		Sacatepequez	14.67	-90.75	1940
374	C-CF19-AC-W-ME			C-CF19	P. coccineus		Wild	Mesoamerica	Mexico
375	PI325584-AC-W-ME		USDA	PI325584	P. coccineus		Wild	Mesoamerica	Mexico
376	PI417592-AC-W-ME	Y	USDA	PI430191	P. coccineus		Wild	Mesoamerica	Mexico	Rancho Los Caracoles		Chihuahua	27.6	-107.17	297
377	PI417608-AC-W-ME	Y	USDA	PI430192	P. coccineus		Wild	Mesoamerica	Mexico	Rancho Los Caracoles.		Chihuahua	28.6	-107.17	297
378	PI417611-AC-W-ME	Y	USDA	PI417592	P. coccineus		Wild	Mesoamerica	Mexico	Cerro de Espinosa del Diablo (between San Miguel El Alto and San Julian)		Jalisco	25.55	-106.37	1723
379	PI430191-AC-W-ME	Y	USDA	PI417611	P. coccineus		Wild	Mesoamerica	Mexico	Cerro Aguila, Barranca del Muerto, Santa Maria del Valle.		Jalisco	20.87	-102.37	2076
380	PI430192-AC-W-ME	Y	USDA	PI417608	P. coccineus		Wild	Mesoamerica	Mexico	Rio Buche near Santa Maria del Valle		Jalisco	20.87	-102.37	2076
